# Supplementary material for: Molecular dynamics study on the aggregation behaviour of different positional isomers of sodium dodecyl benzenesulphonate
Source: Royal Society of Chemistry journal article supplement (doi:10.1039/c6ra05188j), 2016-01-01
Supplement: c6ra05188j1.pdf [file c6ra05188j1.pdf]

Supporting information for

**Molecular dynamics study on aggregation behaviours of different positional isomers of sodium  
dodecyl benzenesulphonate**

Yaoyao Wei<sup>a</sup>, Guokui Liu<sup>a</sup>, Zhongni Wang<sup>b</sup>, and Shiling Yuan<sup>\*a</sup>

<sup>a</sup>Key Lab of Colloid and Interface Chemistry, Shandong University, Jinan 250100, China

<sup>b</sup>College of Chemistry, Chemical Engineering and Materials Science, Collaborative Innovation  
Center of Functionalized Probes for Chemical Imaging in Universities of Shandong, Shandong  
Normal University, Jinan 250014, PR China

Table S1 Detailed shape of micelles

|         | 1 $\Phi$ 12 | 2 $\Phi$ 12 | 3 $\Phi$ 12 | 4 $\Phi$ 12 | 5 $\Phi$ 12 | 6 $\Phi$ 12 |
|---------|-------------|-------------|-------------|-------------|-------------|-------------|
| R11/R22 | 1.04        | 1.04        | 1.04        | 1.06        | 1.04        | 1.08        |
| R22/R33 | 1.12        | 1.07        | 1.08        | 1.13        | 1.34        | 1.32        |

R11, R22, and R33 are the square roots of the principal moments of inertia with three axes, where  $R11 > R22 > R33$ .

Table S2 The hydration numbers of different sections for SDBS molecules

|                  | 1 $\Phi$ 12 | 2 $\Phi$ 12 | 3 $\Phi$ 12 | 4 $\Phi$ 12 | 5 $\Phi$ 12 | 6 $\Phi$ 12 |
|------------------|-------------|-------------|-------------|-------------|-------------|-------------|
| sulphonate group | 1.89        | 1.93        | 1.93        | 1.94        | 1.94        | 1.94        |
| benzene ring     | 1.03        | 1.01        | 0.92        | 0.91        | 0.87        | 0.87        |
| long chain       | 0.10        | 0.06        | 0.06        | 0.06        | 0.06        | 0.10        |
| short chain      | -           | 0.37        | 0.30        | 0.25        | 0.22        | 0.16        |



Fig. S1 Different criterion for the equilibrium justification of 1Φ12 with different time evolution



Fig. S2 Different criterion for the equilibrium justification of 6Φ12 with different time evolution

As shown in Fig. S1 and Fig. S2, the short time (200 ps) is adequate to reach the appropriate temperature, pressure, and density (or volume). Especially, the average density for 1Φ12 and 6Φ12 between 100ps and 200ps are  $985.50 \pm 1.25 \text{ kg/m}^3$  and  $985.24 \pm 1.11 \text{ kg/m}^3$ , respectively, which are consistent with the density of ca.  $0.99 \text{ g/cm}^3$  for SPC water model.<sup>5</sup> And the density is

smooth among the long lasting ca. 2 ns trajectory. Above all, the appropriate and stable density is important for the next NVT simulation.



Fig. S3 Snapshots at different time points of 1Φ12 micelle. For clarity, water molecules and sodium ions are removed. Red: O atom; Yellow: S atoms; Turquoise: C atoms; Light gray: H atoms.



Fig. S4 Radius of gyration for the micelle during the 50 ns NVT simulation in all six systems.

As shown in the figure, the former four micelles converge well after about 30 ns NVT simulation while the latter two micelles behave not as well as the four micelles. However, it is reasonable to use the last 20 ns data to do analyses considering slight fluctuations of the curves.



Fig. S5. Accessible surface areas



Fig. S6 Probability of gauche defects in the hydrophobic chain. Dihedral 1 represents the dihedral nearest to the benzene ring in 1Φ12 micelle and the dihedral from the terminal C atom of short chain in other five micelles.



Fig. S7 The density distribution of the selected atoms to micelle center of mass distance. The c26 represents two carbon atoms meta to the sulphonate group, and the c35 represents two carbon atoms ortho to the sulphonate group on the benzene ring.

The curve of water for 1Φ12 micelle is consistent with previous study.<sup>1</sup> It's noted that the density of water between c26 and c35 is too small to be recognized in the figure for 6Φ12. However, we have checked the data to verify that the water penetration is between the c26 and c35 in agreement with other isomers and previous experimental study.<sup>2</sup>

The detailed force field parameters for all the studied systems are as follows:

Partial atomic charges of six isomers:

1Φ12



2Φ12



3Φ12



4Φ12



5Φ12



6Φ12



**Non bonded and bonded parameters:****Normal van der Waals Parameters**

| Atom type | $[C6(l,l)]^{1/2}$ [(kJmol <sup>-1</sup> nm <sup>6</sup> ) <sup>1/2</sup> ] | $[C12(l,l)]^{1/2}$ [10 <sup>-3</sup> (kJmol <sup>-1</sup> nm <sup>12</sup> ) <sup>1/2</sup> ] |
|-----------|----------------------------------------------------------------------------|-----------------------------------------------------------------------------------------------|
| OM        | 0.04756                                                                    | 0.8611                                                                                        |
| HC        | 0.009200                                                                   | 0.1230                                                                                        |
| SDmso     | 0.10277                                                                    | 4.6366                                                                                        |
| C         | 0.04838                                                                    | 2.222                                                                                         |

**Bond-Stretching Parameters**

|               | Force constant $K_b$<br>(10 <sup>6</sup> kJmol <sup>-1</sup> nm <sup>-4</sup> ) | Ideal bond length<br>$b_0$ (nm) |
|---------------|---------------------------------------------------------------------------------|---------------------------------|
| C-C           | 5.43                                                                            | 0.152                           |
| C-C (benzene) | 8.66                                                                            | 0.139                           |
| C-H           | 12.1                                                                            | 0.110                           |
| C-S           | 5.94                                                                            | 0.178                           |
| S-O           | 2.66                                                                            | 0.141                           |

**Bond-Angle Bending Parameters**

|                           | Force constant $K_\theta$<br>(kJmol <sup>-1</sup> ) | Ideal bond angle $\vartheta_0$<br>(degree) |
|---------------------------|-----------------------------------------------------|--------------------------------------------|
| C-C-H                     | 285                                                 | 109.5                                      |
| C(benzene) -C(benzene) -H | 505                                                 | 120.0                                      |
| C-C-C                     | 530                                                 | 111.0                                      |
| H-C-H                     | 1440                                                | 107.0                                      |
| H(methyl)-C-H(methyl)     | 443                                                 | 108.5                                      |
| C-S-O                     | 503                                                 | 106.8                                      |
| S-C-C                     | 750                                                 | 125.0                                      |
| H-C-C (benzene)           | 505                                                 | 120.0                                      |

**Dihedral-angle parameters**

|                             | Force constant $K_\zeta$<br>(kJmol <sup>-1</sup> degree <sup>-2</sup> ) | Ideal dihedral angle $\zeta_0$<br>(degree) |
|-----------------------------|-------------------------------------------------------------------------|--------------------------------------------|
| C-C-C-H                     | 5.92                                                                    | 0.0                                        |
| C( benzene)-C( benzene)-S-O | 1.00                                                                    | 0.0                                        |
| C-C-C-C                     | 5.92                                                                    | 0.0                                        |

### Improper (harmonic) dihedral-angle parameters

|                   | Force constant $K_{\zeta}$<br>(kJmol <sup>-1</sup> degree <sup>-2</sup> ) | Ideal improper dihedral angle<br>$\zeta_0$ (degree) |
|-------------------|---------------------------------------------------------------------------|-----------------------------------------------------|
| C-C-C-H (benzene) | 167.36                                                                    | 0.0                                                 |
| C-C-C-C (benzene) | 167.36                                                                    | 0.0                                                 |

#### Notes and References

1. Palazzesi, F.; Calvaresi, M.; Zerbetto, F., A molecular dynamics investigation of structure and dynamics of SDS and SDBS micelles. *Soft Matter* **2011**, 7, (19), 9148.
2. Das, S.; Bhirud, R. G.; Nayyar, N.; Narayan, K. S.; Kumar, V. V., Chemical shift changes on micellization of linear alkyl benzenesulphonate and oleate. *J. Phys. Chem.* **1992**, 96, (18), 7454-7457.
